# Supplementary material for: Underestimated risks of future storm surge extremes: A global study
Source: Research Square preprint supplement (doi:10.21203/rs.3.rs-8142732/v1), 2025-11-28
Supplement: Supplementary file 1 [file 5bbde176a606a3aab63cac09.pdf]

Supplementary Information for:  
*Underestimated risks of future storm surge extremes:  
A global study*

Peter Thejll et al.

November 18, 2025

## Contents

1. Results for all non-stationary locations
2. Supplementary Figures
3. Omitted GESLA series.
4. Distribution Tables for  $\beta$  and MSL Slopes

# 1. Results for non-stationary locations

Table 1: Tide-gauge stations that show statistically significant non-stationarity in the location parameter of the extreme-value distribution. Columns (1)-(4) identify the station, (5) is the length of the data series in years, (6) is the likelihood ratio test  $p$  value. Column (7) gives the coefficient of the covariate in the non-stationary GEV model, and (8) is the difference in AIC between stationary and non-stationary GEV model.

| Station<br>(1)      | Country<br>(2) | lon<br>(3) | lat<br>(4) | N<br>(5) | $p$<br>(6) | $\beta$<br>(7) | $\Delta AIC$<br>(8) |
|---------------------|----------------|------------|------------|----------|------------|----------------|---------------------|
| Buenos Aires        | ARG            | -58.50     | -34.67     | 57       | 0.00009    | 2.3            | 13.3                |
| Albany              | AUS            | 117.89     | -35.03     | 55       | 0.02575    | 0.3            | 3.0                 |
| Newcastle           | AUS            | 151.79     | -32.92     | 56       | 0.00243    | -0.6           | 7.2                 |
| Buenaventura        | COL            | -77.06     | 3.89       | 62       | 0.04681    | -0.7           | 1.9                 |
| Tumaco              | COL            | -78.73     | 1.82       | 68       | 0.04455    | -1.1           | 2.0                 |
| Cuxhaven            | DEU            | 8.72       | 53.87      | 102      | 0.00086    | 2.4            | 9.1                 |
| Esbjerg             | DNK            | 8.43       | 55.47      | 71       | 0.00218    | 1.6            | 7.4                 |
| La Libertad         | ECU            | -80.92     | -2.20      | 70       | 0.00620    | -0.1           | 5.5                 |
| Newlyn Cornwall     | GBR            | -5.54      | 50.10      | 102      | 0.00170    | -0.5           | 7.9                 |
| Fukue               | JPN            | 128.85     | 32.70      | 56       | 0.00339    | -0.6           | 6.6                 |
| Mera                | JPN            | 139.82     | 34.92      | 55       | 0.02967    | 0.4            | 2.7                 |
| Okada               | JPN            | 139.39     | 34.79      | 60       | 0.01998    | -0.5           | 3.4                 |
| Tokuyama            | JPN            | 131.80     | 34.04      | 70       | 0.02520    | -0.4           | 3.0                 |
| Kwajalein           | MHL            | 167.73     | 8.73       | 73       | 0.00131    | -0.2           | 8.3                 |
| Bergen              | NOR            | 5.32       | 60.40      | 103      | 0.00042    | 0.7            | 10.4                |
| Bodo                | NOR            | 14.40      | 67.29      | 71       | 0.01421    | 1.1            | 4.0                 |
| Harstad             | NOR            | 16.55      | 68.80      | 69       | 0.00113    | 0.8            | 8.6                 |
| Narvik              | NOR            | 17.43      | 68.43      | 81       | 0.00247    | 0.7            | 7.2                 |
| Oscarsborg          | NOR            | 10.60      | 59.68      | 68       | 0.02160    | 0.7            | 3.3                 |
| Tromso              | NOR            | 18.95      | 69.65      | 69       | 0.01959    | 0.5            | 3.4                 |
| Furuogrud           | SWE            | 21.23      | 64.92      | 105      | 0.00000    | -0.3           | 18.9                |
| Goteborg Torshamnen | SWE            | 11.79      | 57.68      | 55       | 0.00115    | 1.6            | 8.6                 |
| Kungsholmsfort      | SWE            | 15.59      | 56.11      | 136      | 0.00268    | 0.8            | 7.0                 |
| Stenungsund         | SWE            | 11.83      | 58.09      | 58       | 0.00197    | 1.4            | 7.6                 |
| Apra Harbor Guam    | USA            | 144.65     | 13.43      | 70       | 0.00370    | -0.1           | 6.4                 |
| Eastport            | USA            | -66.98     | 44.90      | 93       | 0.02980    | -0.3           | 2.7                 |
| La Jolla            | USA            | -117.26    | 32.87      | 98       | 0.00116    | -0.3           | 8.6                 |
| Mayport Ferry Depot | USA            | -81.43     | 30.39      | 73       | 0.03700    | 0.4            | 2.4                 |
| Providence          | USA            | -71.40     | 41.81      | 76       | 0.00898    | -0.9           | 4.8                 |
| San Diego           | USA            | -117.17    | 32.71      | 116      | 0.00057    | -0.3           | 9.9                 |
| San Francisco Ca    | USA            | -122.47    | 37.81      | 122      | 0.00300    | 0.3            | 6.8                 |
| Sitka               | USA            | -135.34    | 57.05      | 84       | 0.00505    | 0.3            | 5.9                 |
| Wake Island         | USA            | 166.62     | 19.29      | 71       | 0.01736    | -0.2           | 3.7                 |
| Yakutat Ak          | USA            | -139.74    | 59.55      | 58       | 0.00051    | 0.2            | 10.1                |

## 2. Supplementary Figures

**SI Figures 1–11.** Statistically significant non-stationary stations. Each figure shows three panels: (left) annual mean sea level trends; (middle) scatterplots of residual extremes vs MSL with a fitted slope ( $\beta$ ); (right) the bootstrapped distribution of  $\beta$  for each station. Figures are grouped by geographic region and shown only for stations where the  $\beta$  parameter is statistically significant at the 5% level.

**SI Figure 12.** Illustrating that stations can have positive or negative MSL trends and residuals with either slope vs MSL.

**SI Figures 13–16.** Showing bathymetric details around each station. Rings are at 1, 5 and 15 km radius.

**SI Figures 17.** Median depths and slopes near non-stationary stations.

## 3. Omitted GESLA series

Among the ocean-coast GESLA data are several that reveal quality issues when inspected. Instead of guessing how to fix some of them (e.g. those with a sharp clear offset in a year) we decided to eliminate such series from analysis. These include Izuhara, Naze, Maisaka, Ominato, Aomorika, Hanasaki, Kamaishi, Kobe, Kozushima, Onahama, Tokyo. Landsort in Sweden has two long series with quite different slope against time, but is otherwise good. Churchill, Canada is eliminated due to concerns over a climate signal entering through retreat of winter ice.

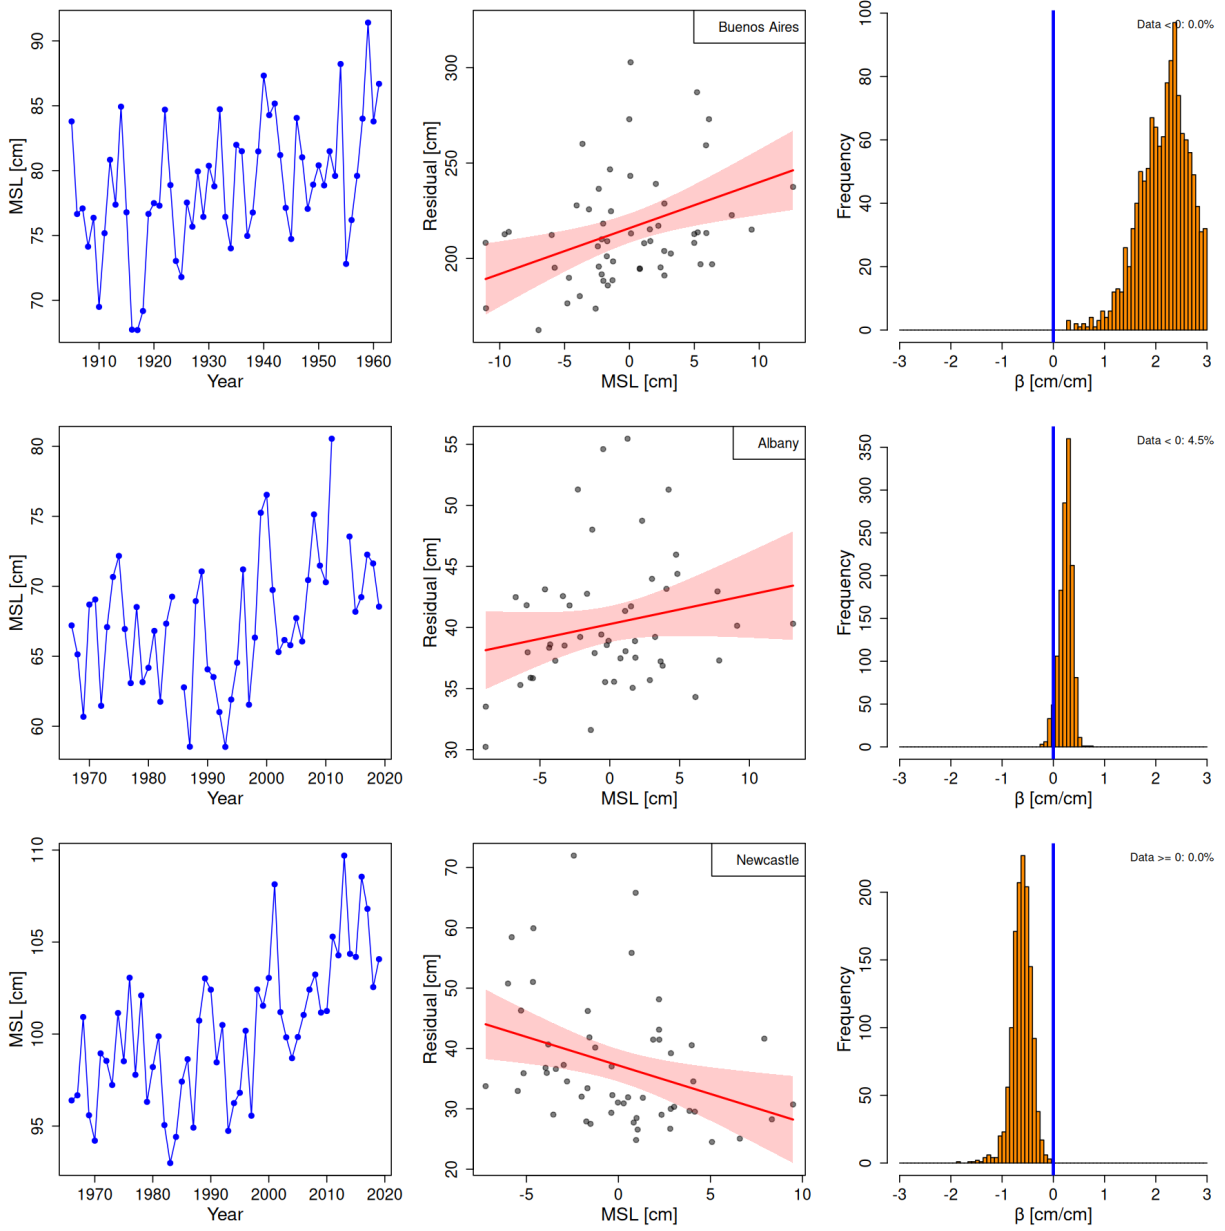

Figure 1: 3 of the statistically significant nonstationary series.



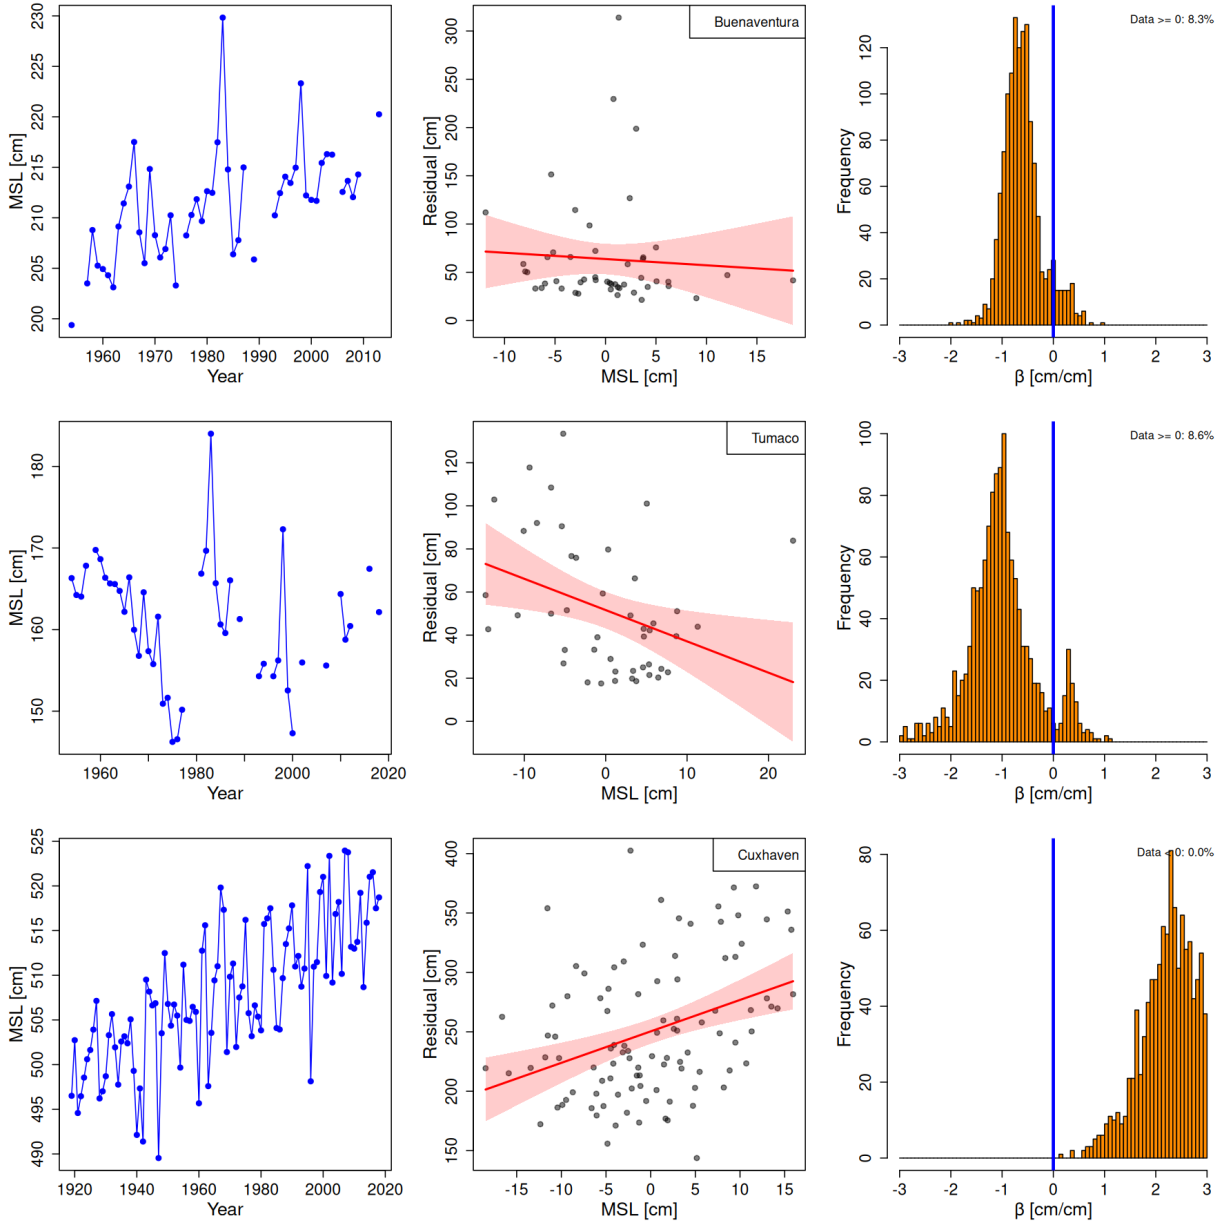

Figure 2: 3 of the statistically significant nonstationary series.

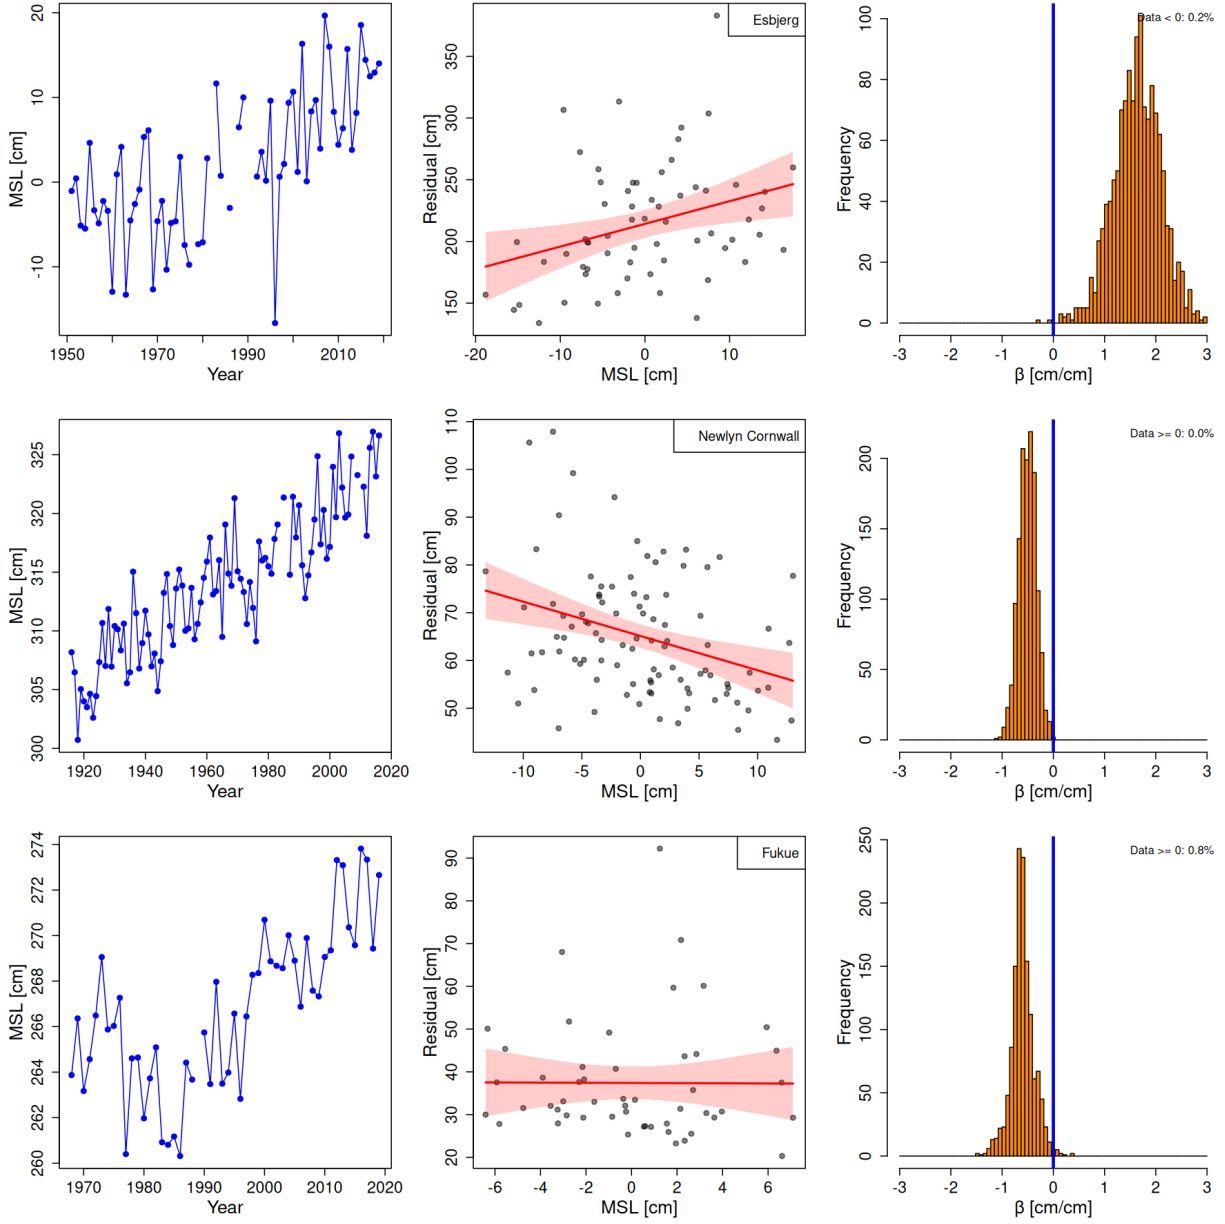

Figure 3: 3 of the statistically significant nonstationary series.

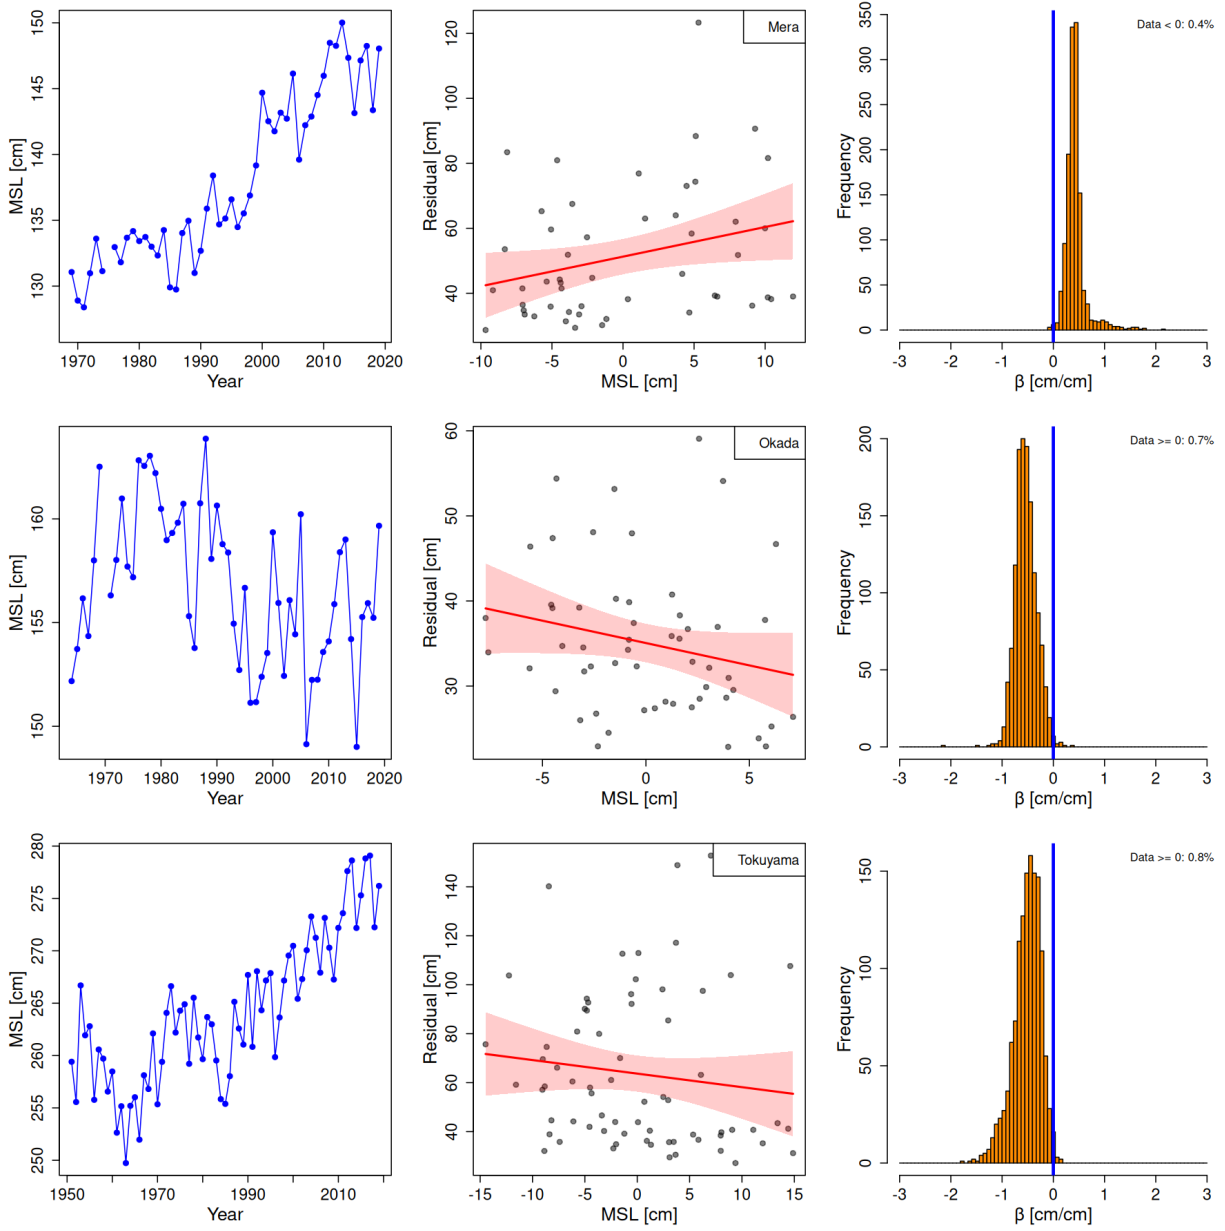

Figure 4: 3 of the statistically significant nonstationary series.

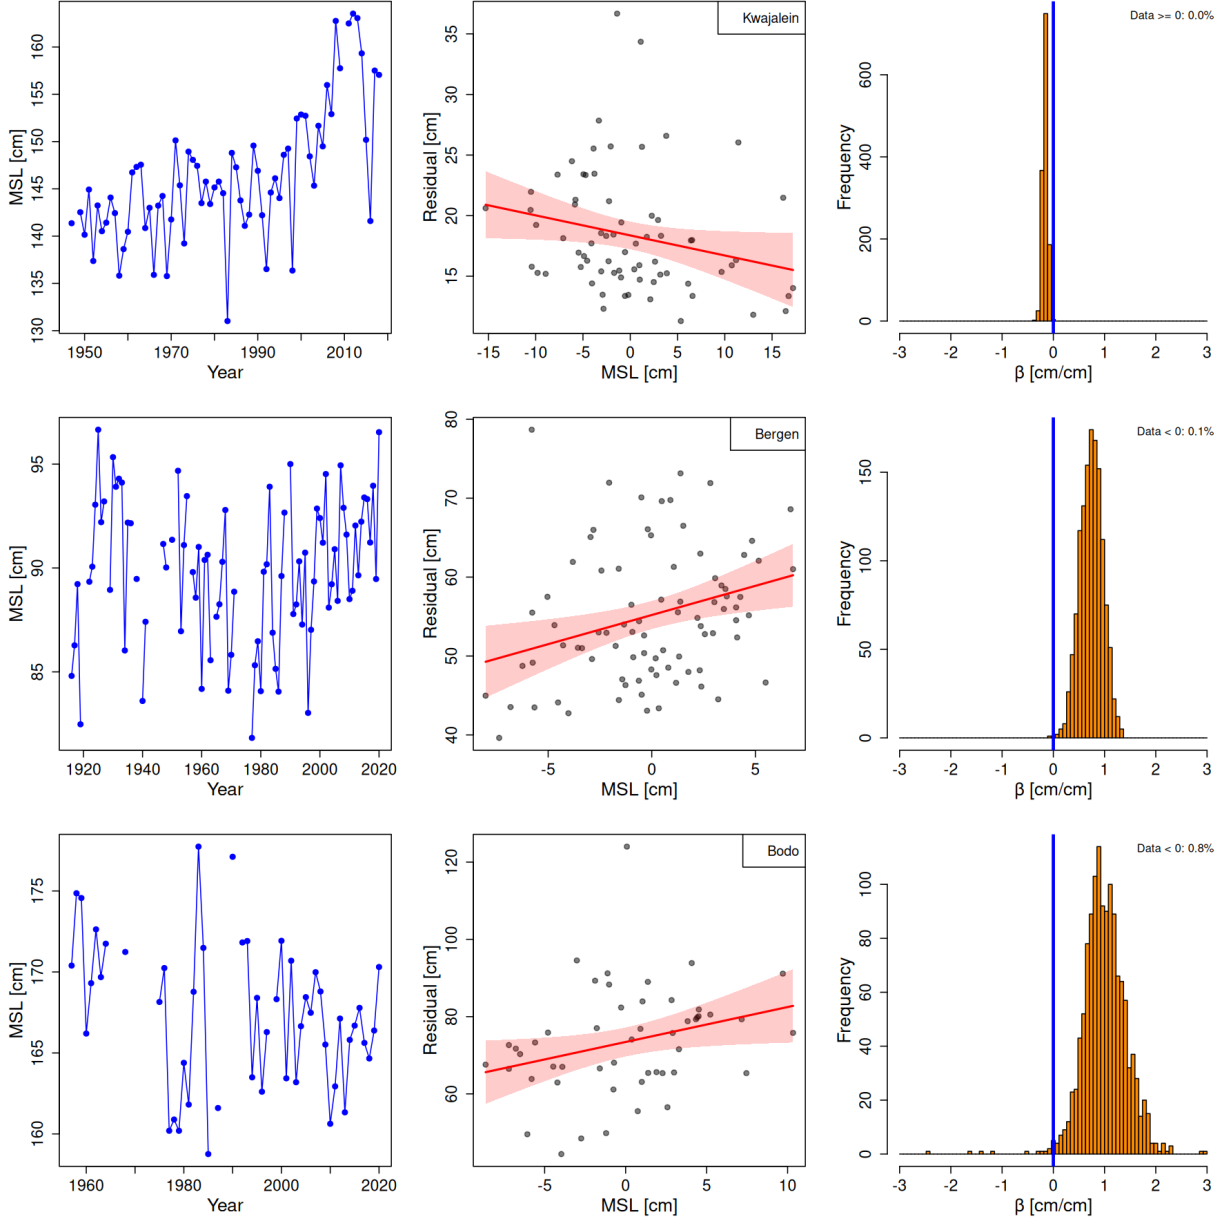

Figure 5: 3 of the statistically significant nonstationary series.

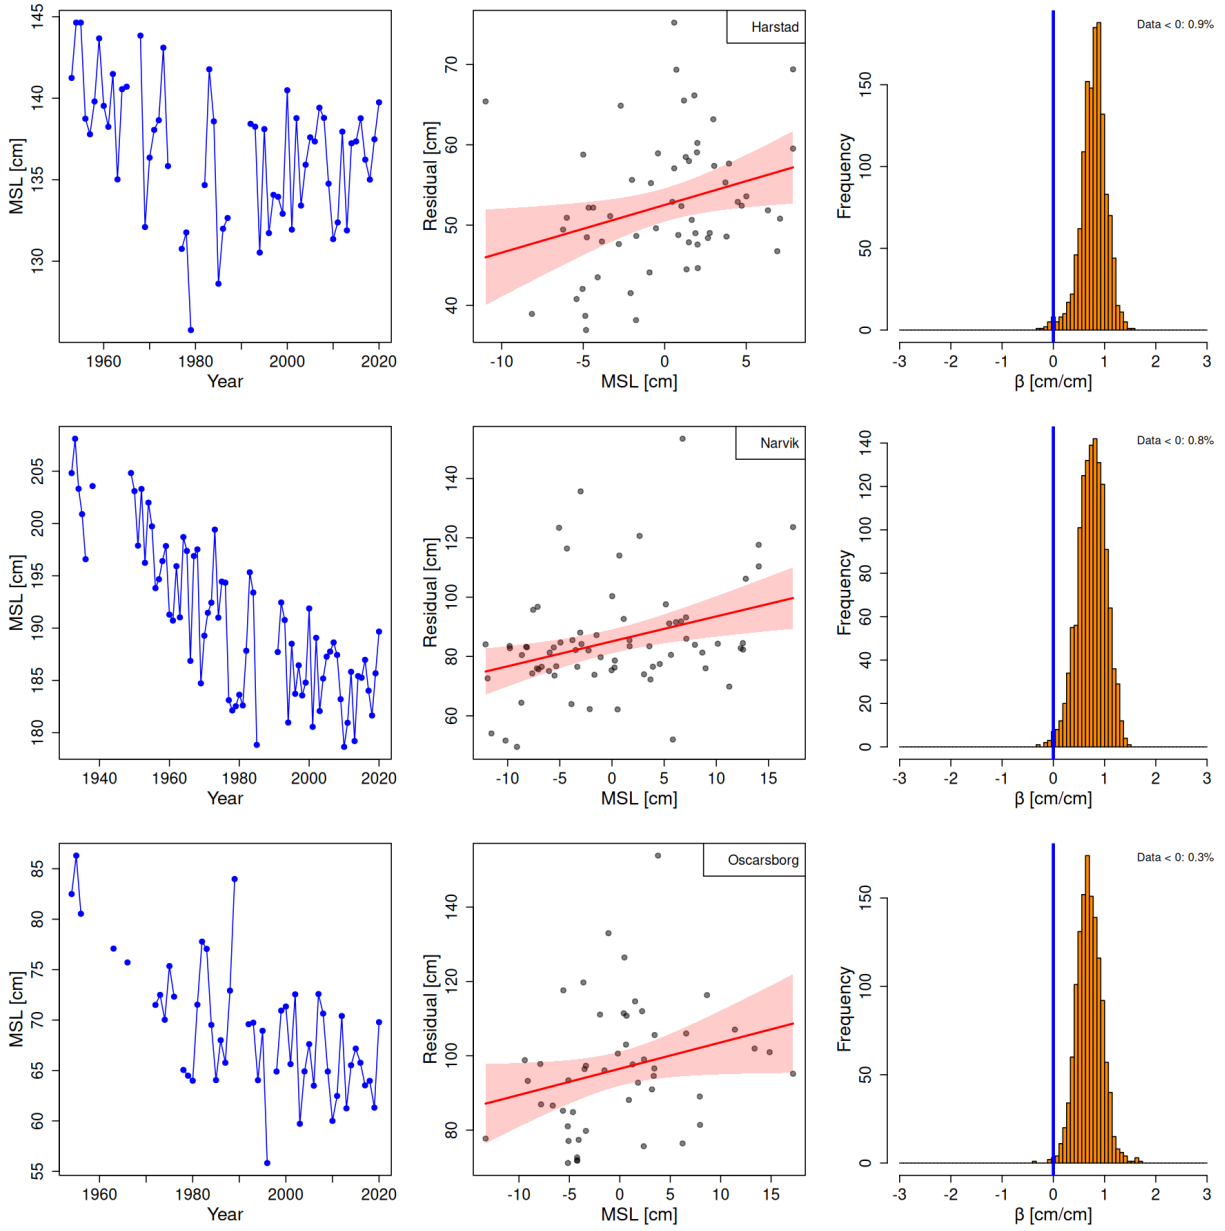

Figure 6: 3 of the statistically significant nonstationary series.

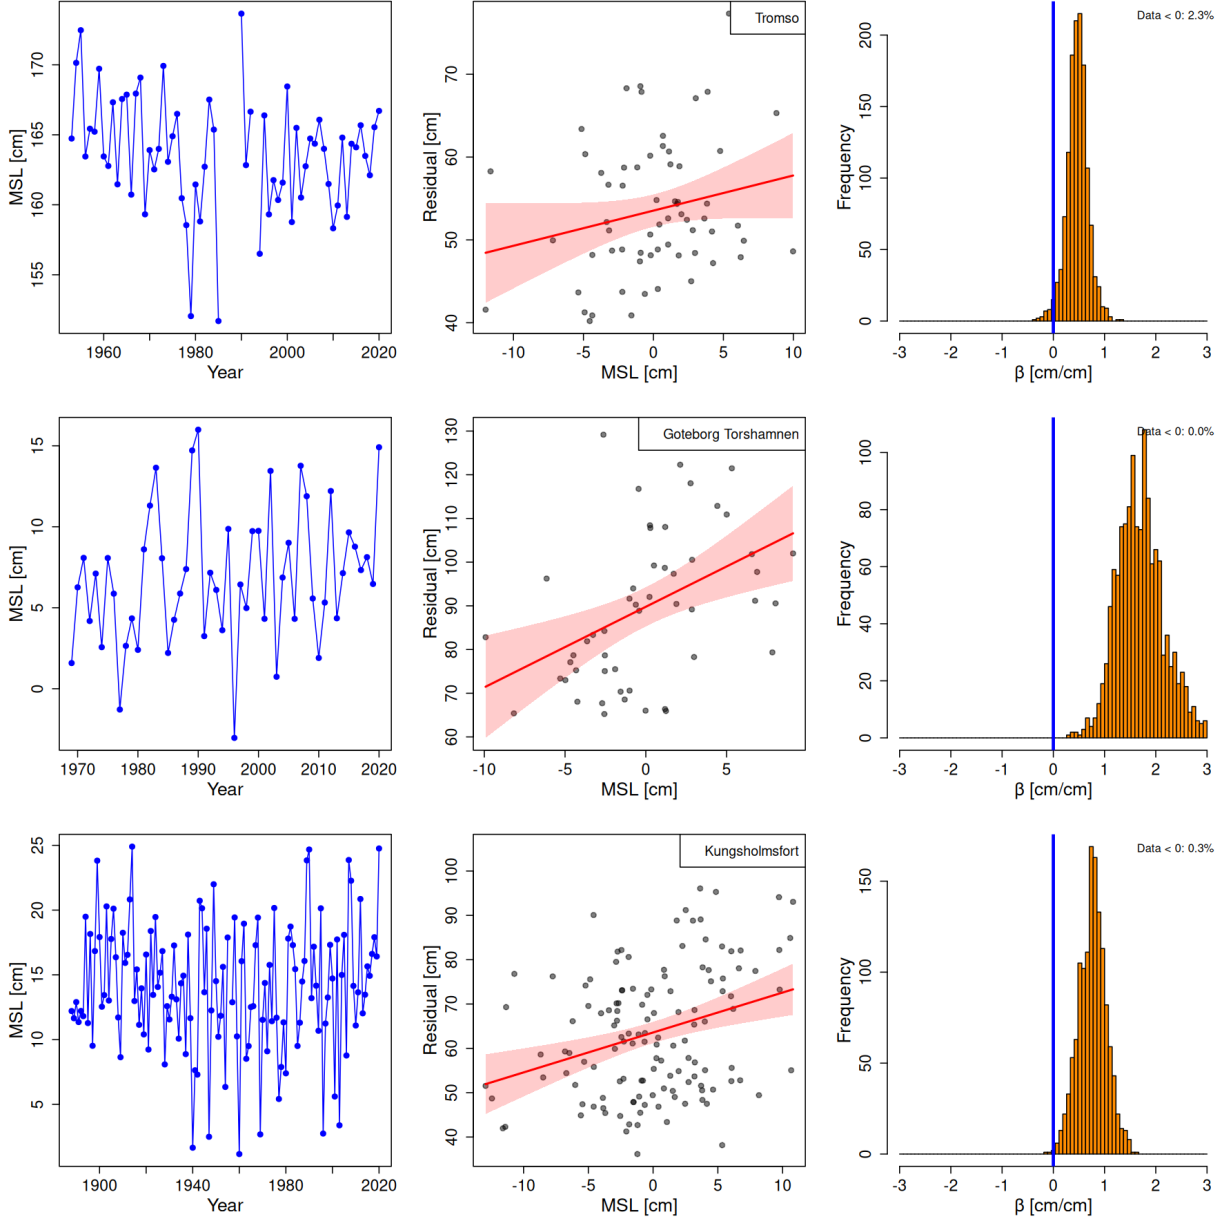

Figure 7: 3 of the statistically significant nonstationary series.

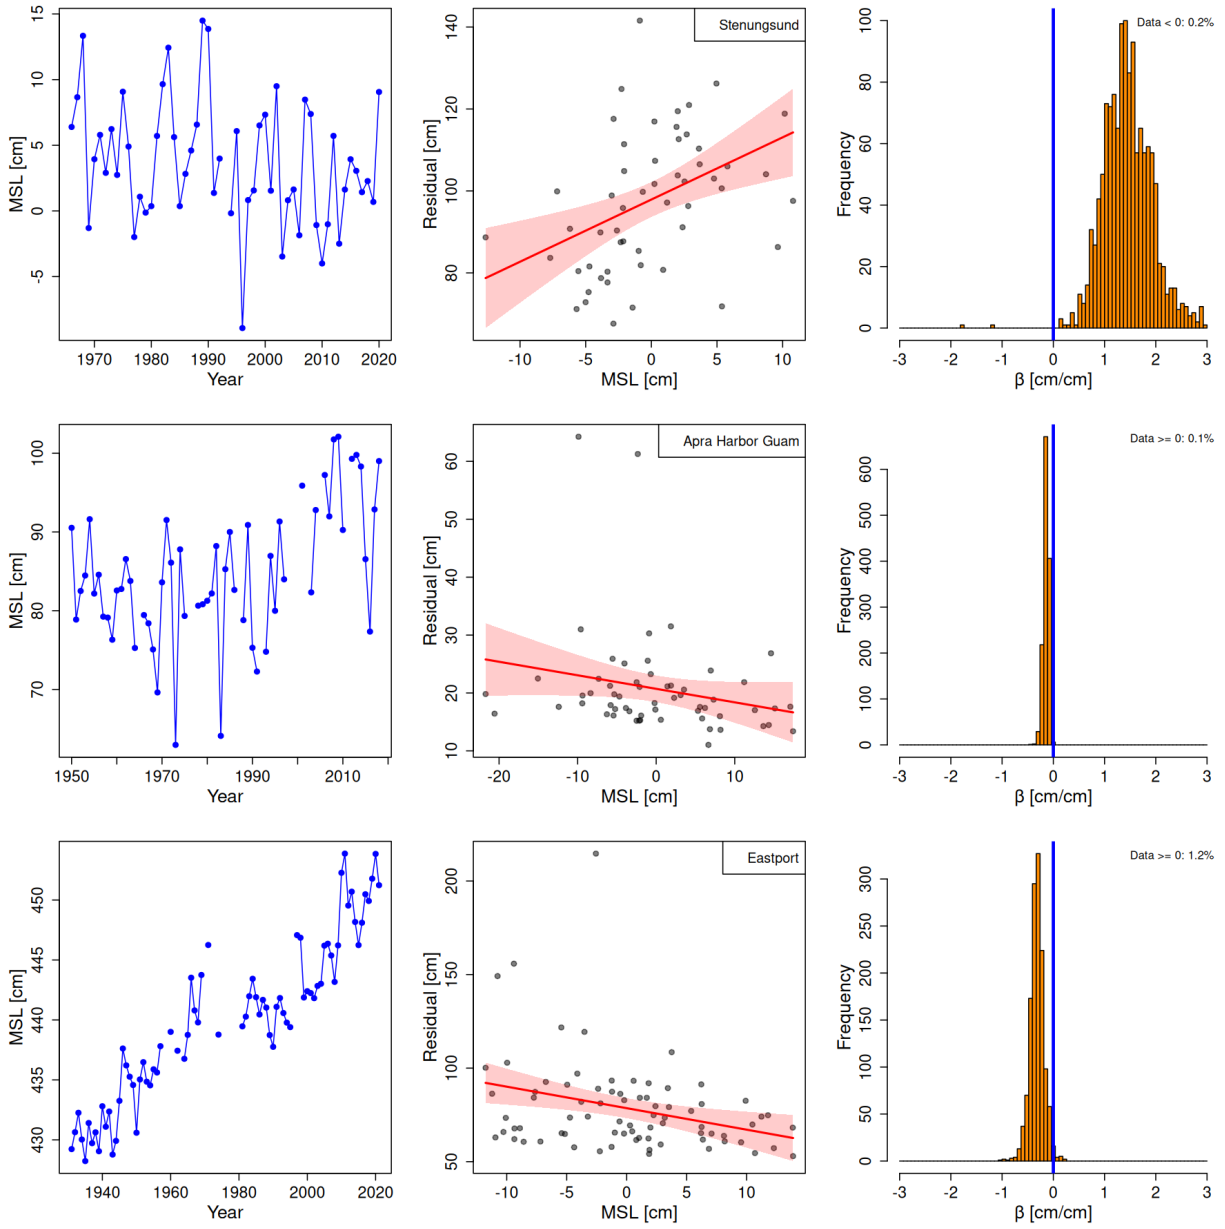

Figure 8: 3 of the statistically significant nonstationary series.

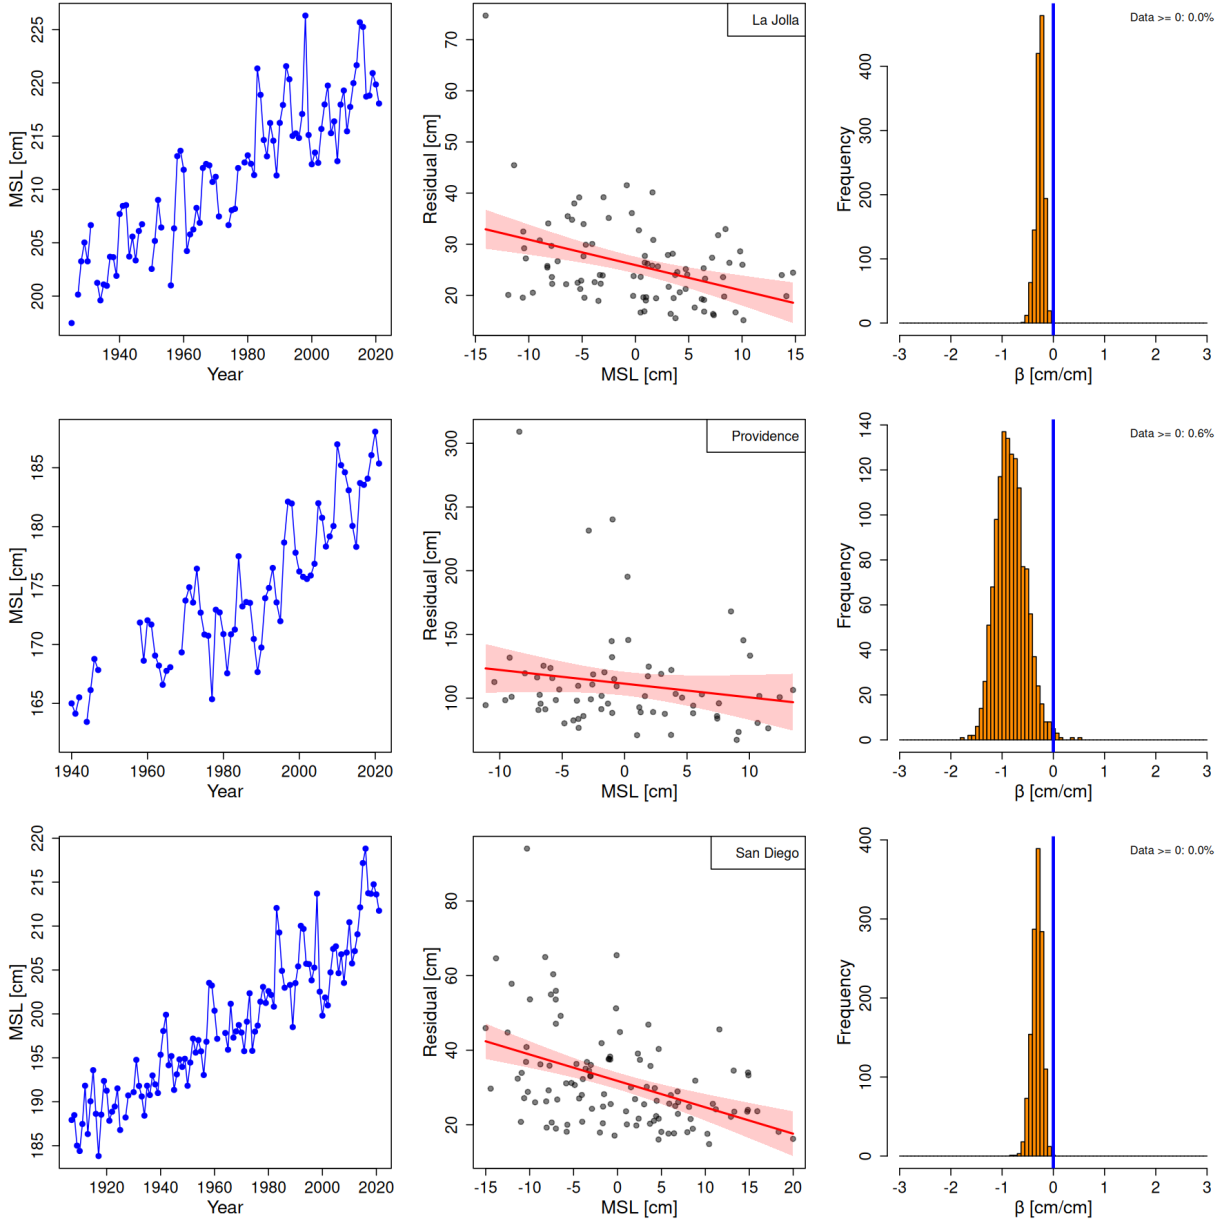

Figure 9: 3 of the statistically significant nonstationary series.



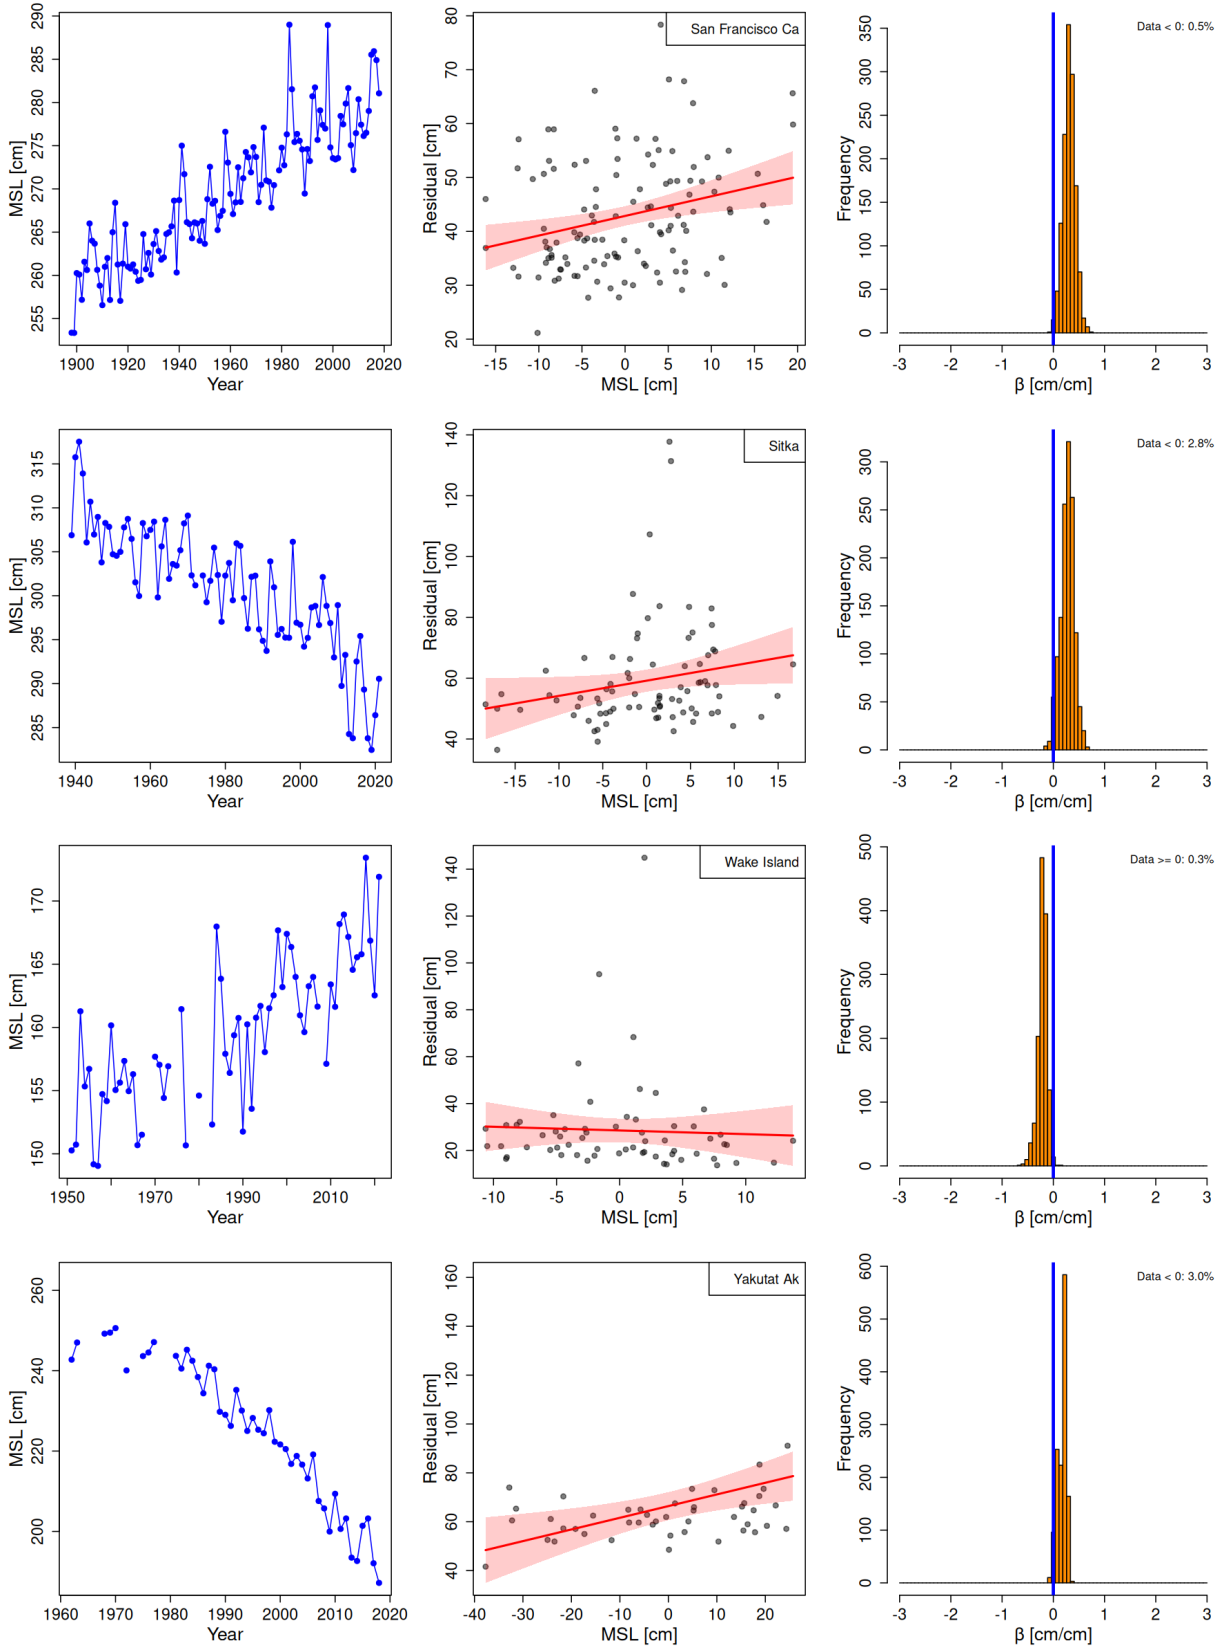

Figure 10: 3 of the statistically significant nonstationary series.

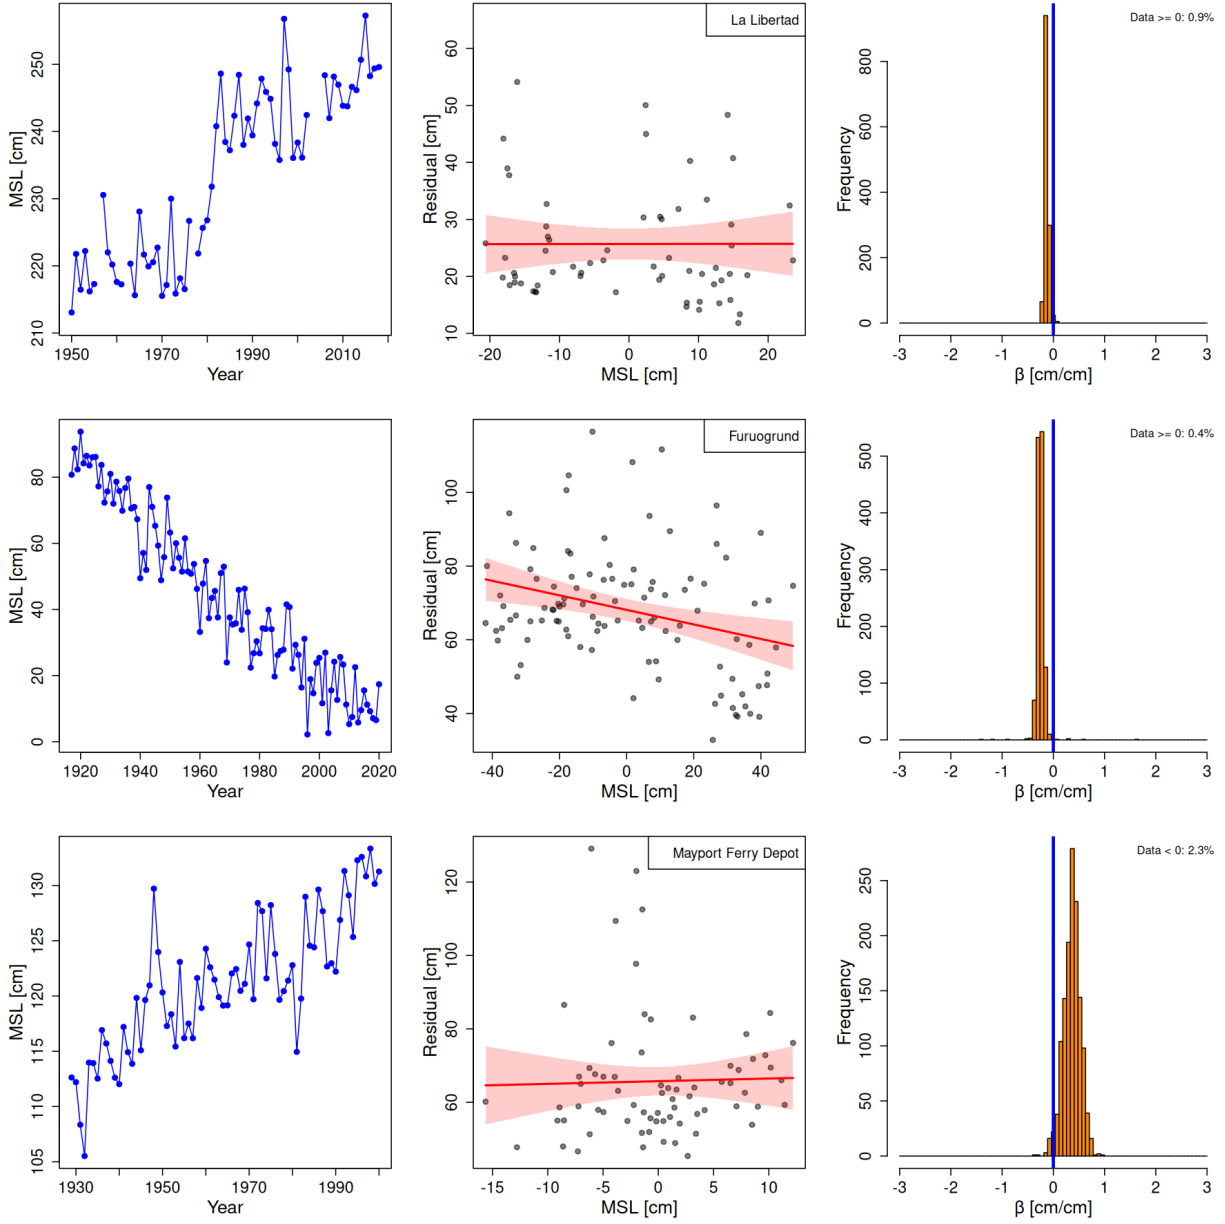

Figure 11: 4 of the statistically significant nonstationary series.

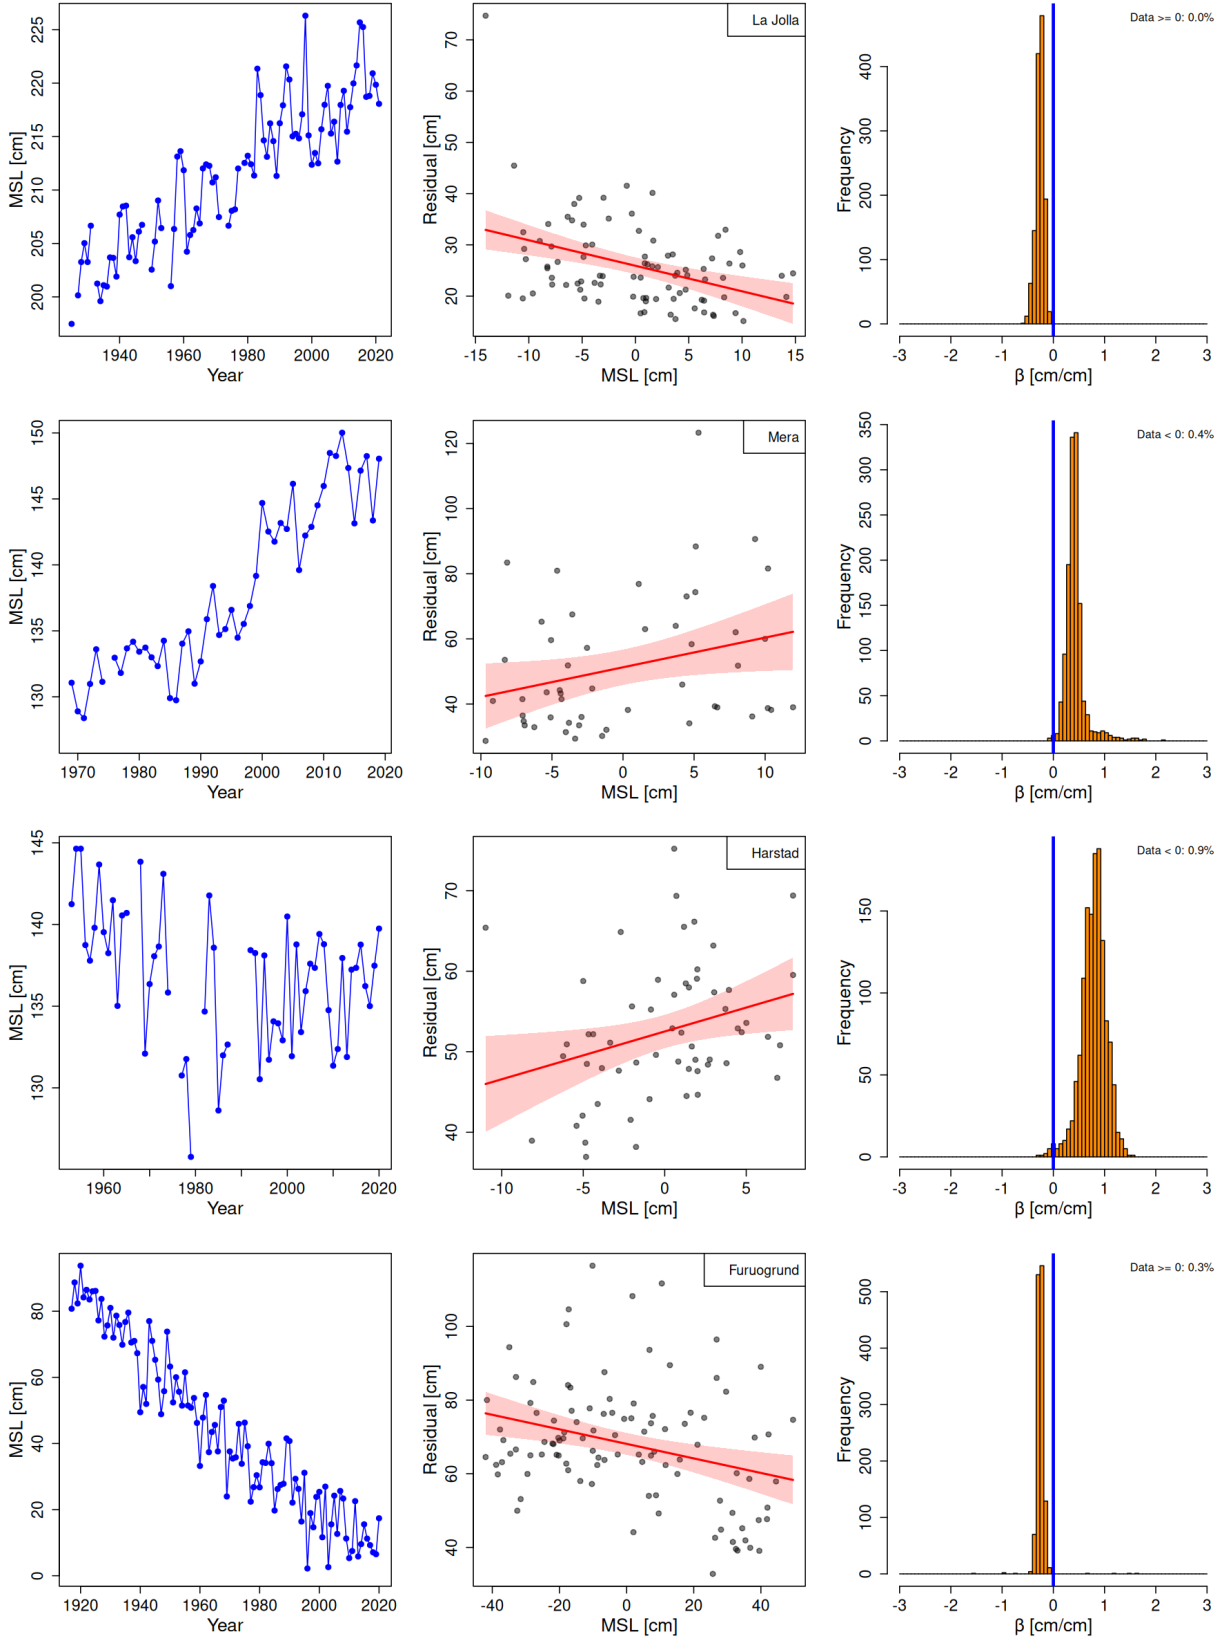

Figure 12: 4 illustrations of how oppositely MSL and extremes can co-evolve.

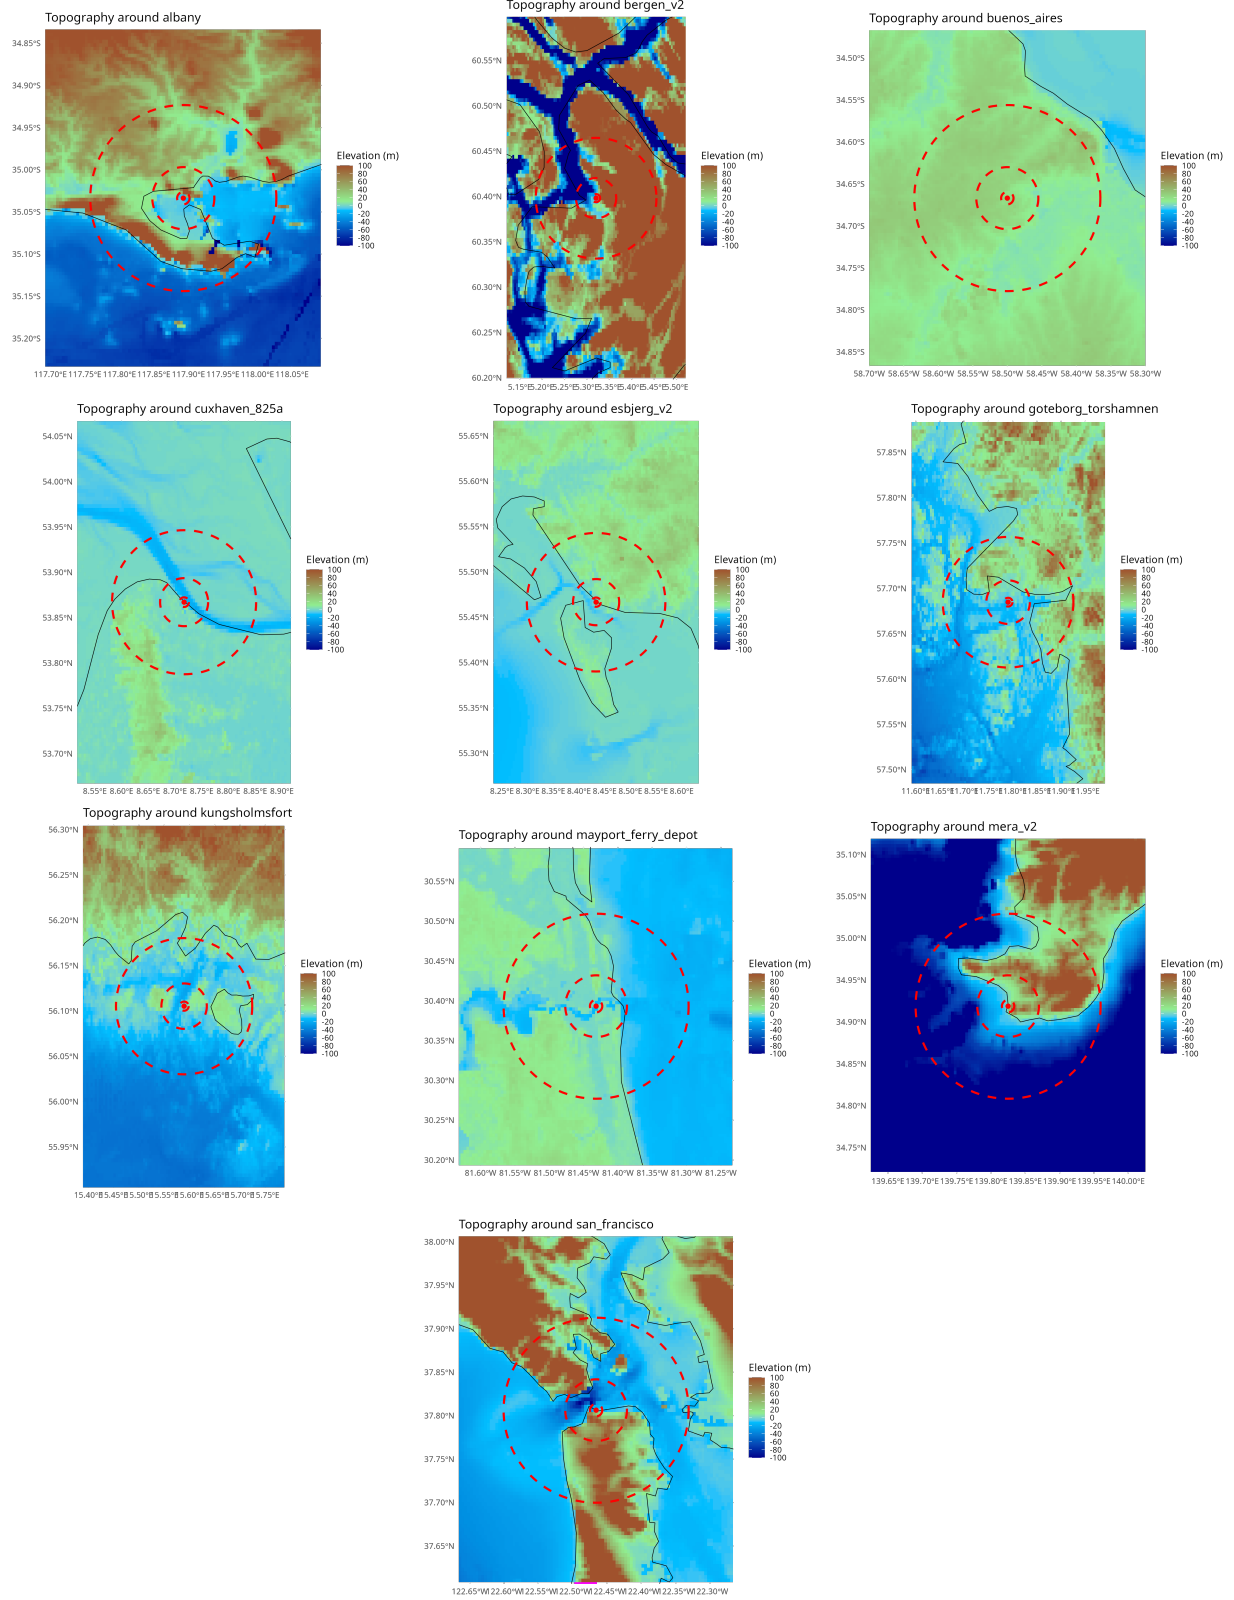

Figure 13: Station maps for the non-stationary stations with positive MSL trend and positive  $\beta$ .

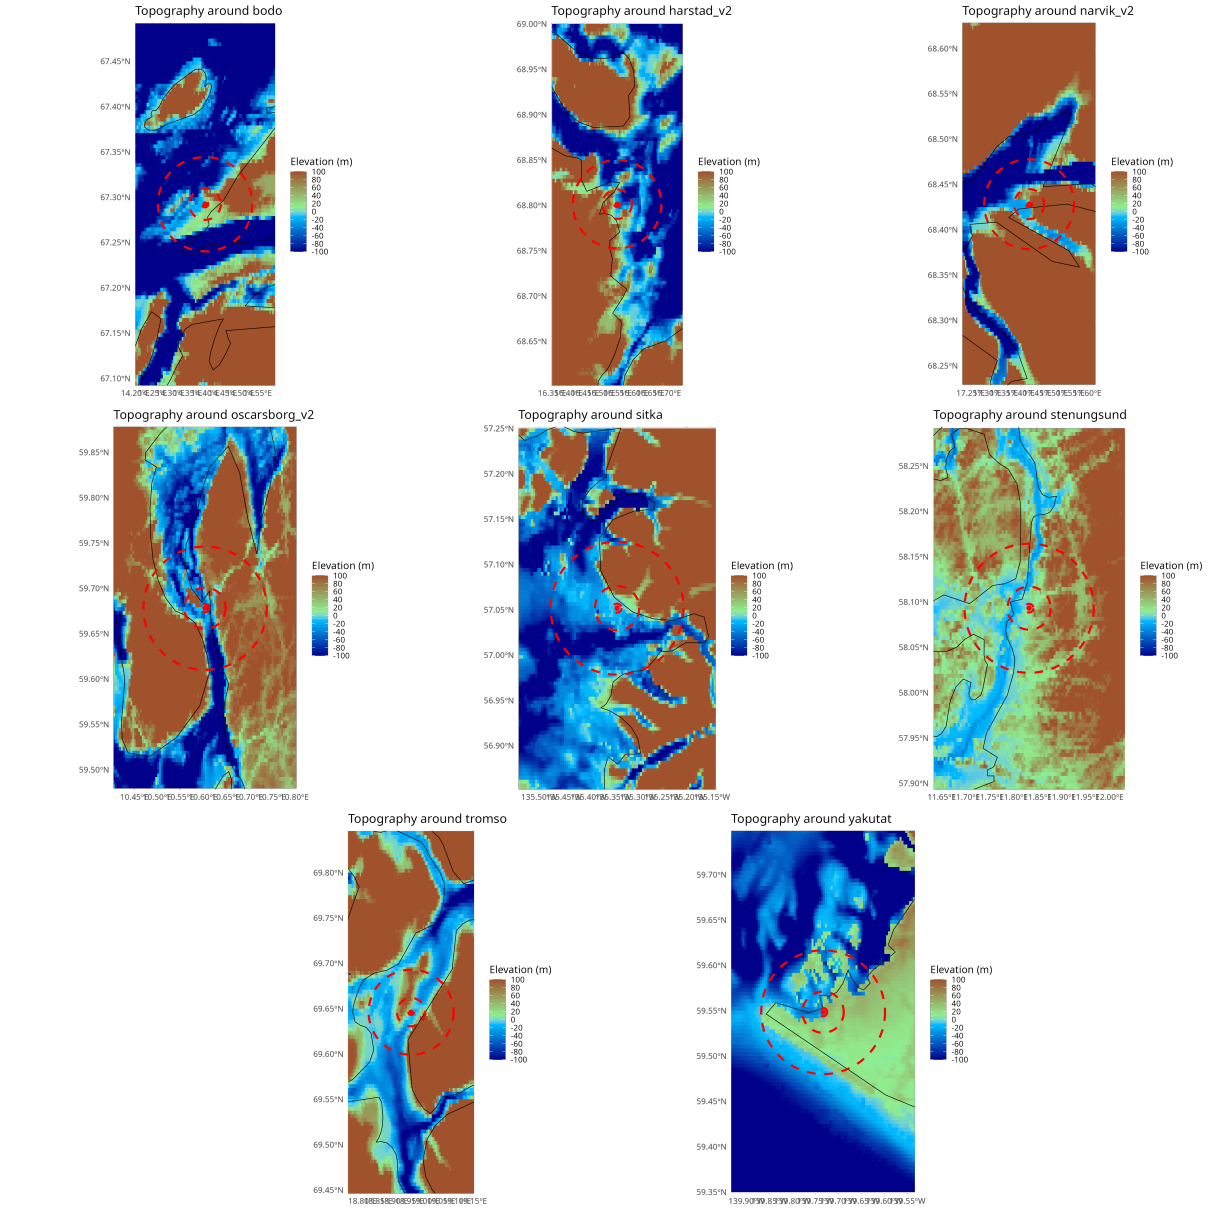

Figure 14: Station maps for the non-stationary stations with negative MSL trend and positive  $\beta$ .

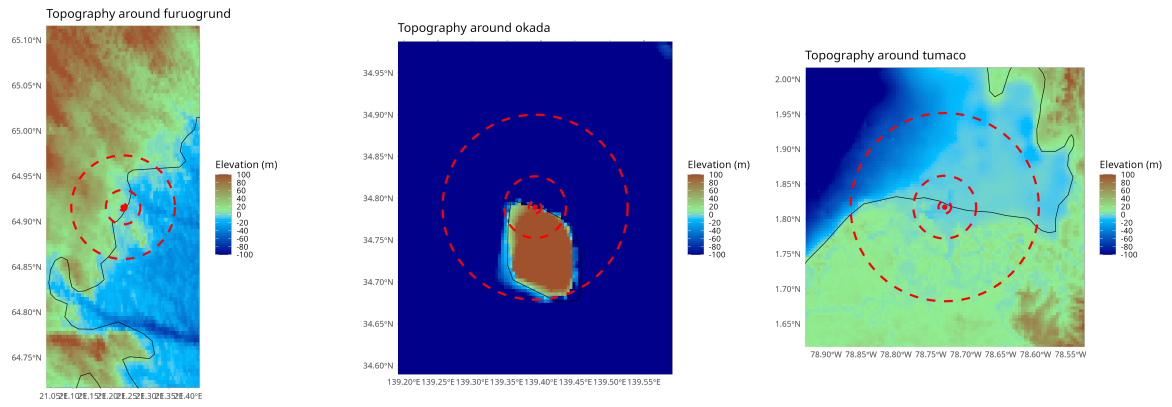

Figure 15: Station maps for the non-stationary stations with negative MSL trend and negative  $\beta$ .

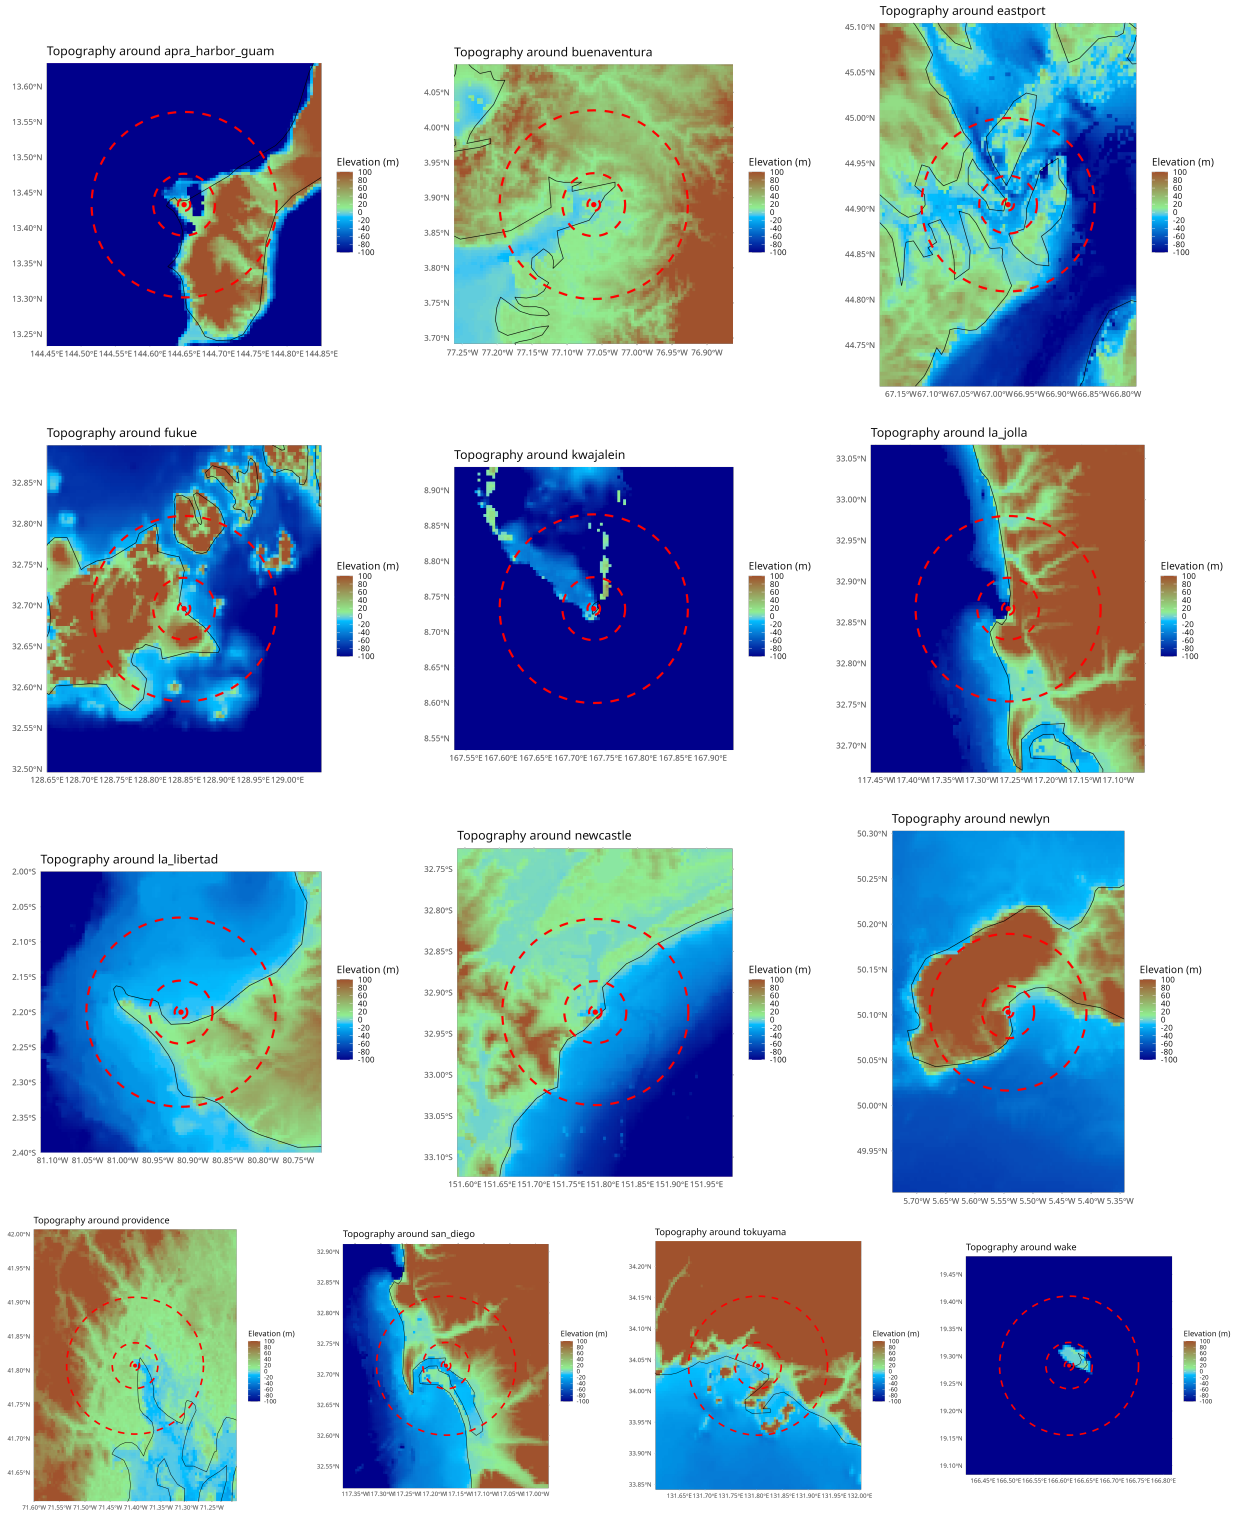

Figure 16: Station maps for the non-stationary stations with positive MSL trend and negative  $\beta$ .

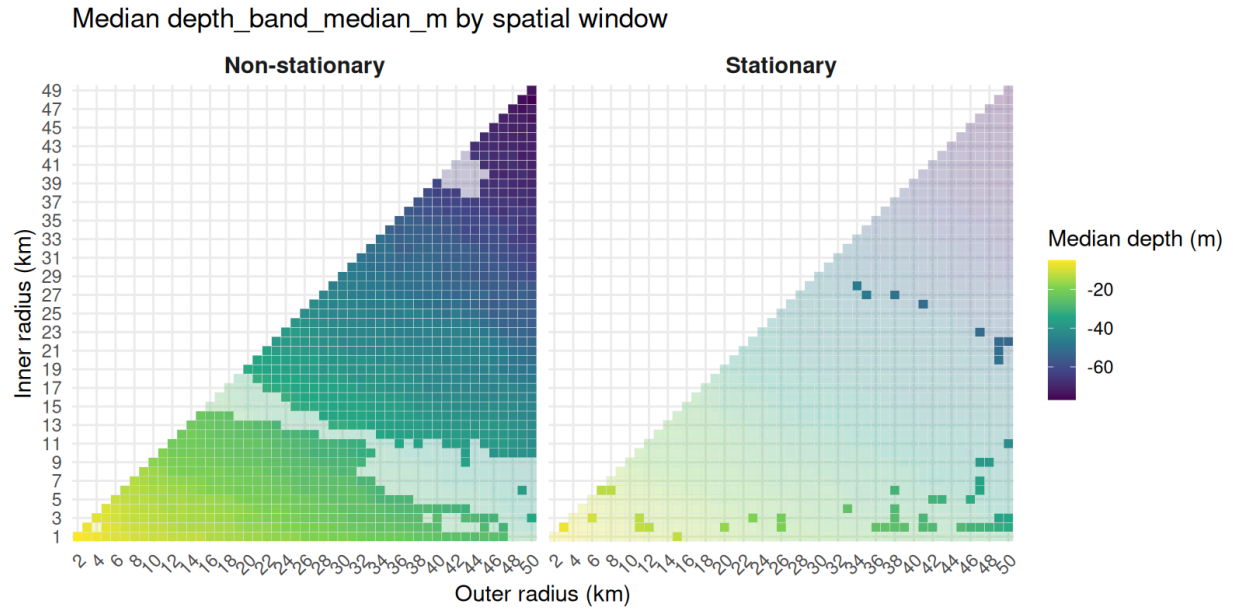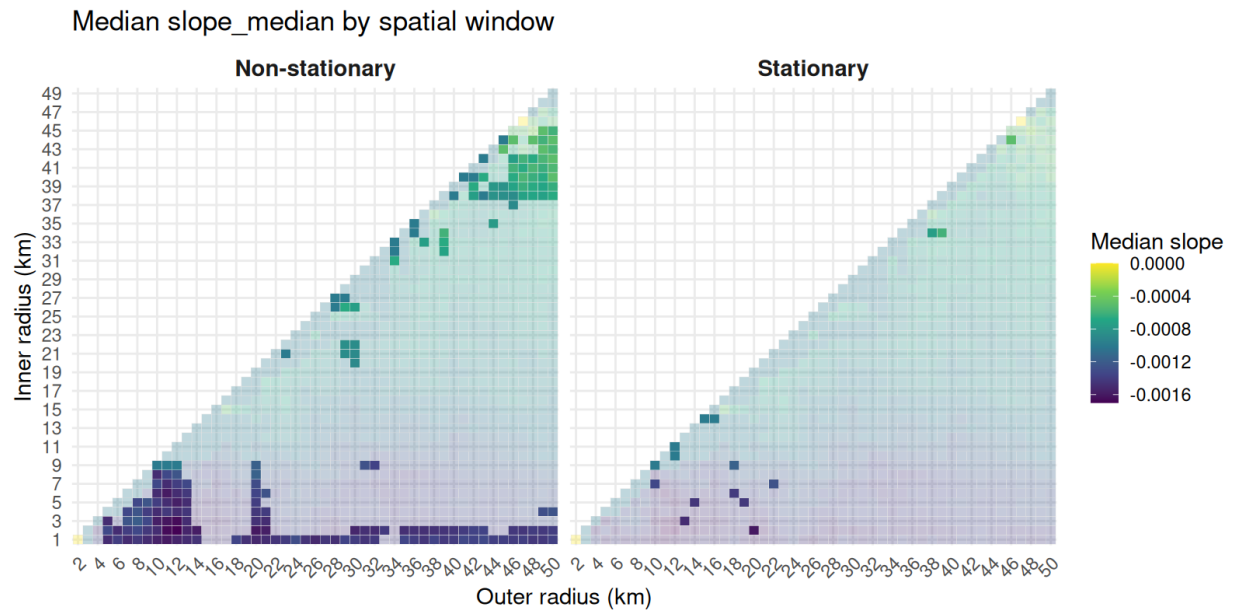

Figure 17: Median values of seabed depths and slopes at various annuli choices.



## 4. Distribution of MSL Slopes and $\beta$ Coefficients

Supplementary Table 2:

| <b>MSL trend <math>&gt; 0</math>, <math>\beta &gt; 0</math></b>                                                                                                                     | <b>MSL trend <math>&gt; 0</math>, <math>\beta &lt; 0</math></b>                                                                                                                                                                        |
|-------------------------------------------------------------------------------------------------------------------------------------------------------------------------------------|----------------------------------------------------------------------------------------------------------------------------------------------------------------------------------------------------------------------------------------|
| Albany AUS<br>Bergen NO<br>Buenos Aires ARG<br>Cuxhaven DE<br>Esbjerg DK<br>Goteborg Torshamnen SE<br>Kungsholmsfort SE<br>Mayport Ferry Depot USA<br>Mera JPN<br>San Francisco USA | Apra Harbor Guam USA<br>Buenaventura COL<br>Eastport USA<br>Fukue JPN<br>Kwajalein MHL<br>La Jolla USA<br>La Libertad ECU<br>Newcastle AUS<br>Newlyn Cornwall UK<br>Providence USA<br>San Diego USA<br>Tokuyama JPN<br>Wake Island USA |
| <b>MSL trend <math>&lt; 0</math>, <math>\beta &gt; 0</math></b>                                                                                                                     | <b>MSL trend <math>&lt; 0</math>, <math>\beta &lt; 0</math></b>                                                                                                                                                                        |
| Bodo NOR<br>Harstad NOR<br>Narvik NO<br>Oscarsborg NO<br>Sitka USA<br>Stenungsund SE<br>Tromso NO<br>Yakutat USA                                                                    | Furuogrund SE<br>Okada JPN<br>Tumaco COL                                                                                                                                                                                               |

Table 2: Joint distribution of signs of mean sea level (MSL) trends and covariate coefficients  $\beta$  for selected tide-gauge stations.
